# Supplementary material for: Screening and Enzymatic Evaluation of Saccharomyces cerevisiae Populations from Spontaneous Fermentation of Organic Verdejo Wines
Source: MDPI journal article supplement (doi:10.3390/foods11213448), 2022-10-30
Supplement: s1 [file s1]

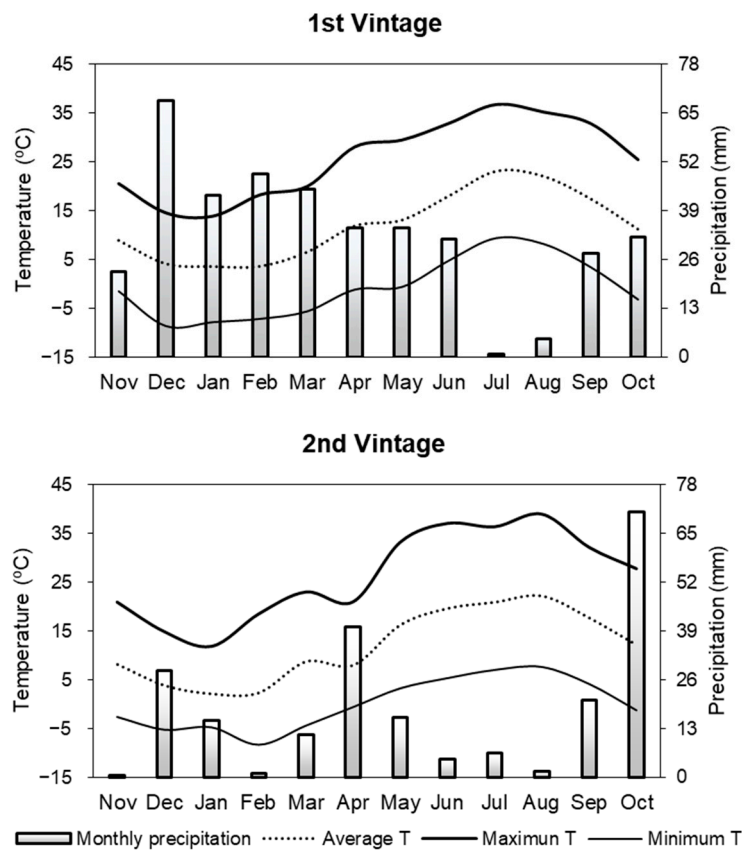

**Figure S1.** Maximum, minimum and average temperatures and monthly precipitation registered in the period of time that defined the first and second vintages. The accumulated precipitation during this time was 393.3 mm and 217.0 mm, respectively. InfoRiego database: [www.inforiego.org](http://www.inforiego.org) and ITACyL database: <http://www.itacyl.es/agro-y-geo-tecnologia/agrometeorologia-y-suelos/datos-meteorologicos>, for the Rueda weather station (VA103), Valladolid.

**Table S1.** Description of the vineyards of this study.

| Description item                   | Vineyard 1        | Vineyard 2  | Vineyard 3            |
|------------------------------------|-------------------|-------------|-----------------------|
| Plantation year                    | 1999              | 1999        | 2005-2006             |
| Variety                            | Verdejo           | Verdejo     | Verdejo               |
| Plantation density (grapevines/ha) | 1111              | 1111        | 3333                  |
| Training system                    | Trellis           | Trellis     | Trellis               |
| Soil type                          | Gravel-clay-sandy | Gravel-clay | Gravel-clay-limestone |
| Orientation                        | S                 | S           | SW                    |
| Orography                          | Plateau           | Plateau     | Plateau               |
